# Supplementary material for: The Longest Colonic Resection Ever: A case report on Subtotal Colectomy of 220 cm in a mentally retardedPatient with Massive Colonic Dilation and Dolichocolon
Source: Research Square preprint supplement (doi:10.21203/rs.3.rs-6797204/v1), 2025-06-25
Supplement: Supplementary file 1 [file 7b91d3bc346d899989779b11.docx]

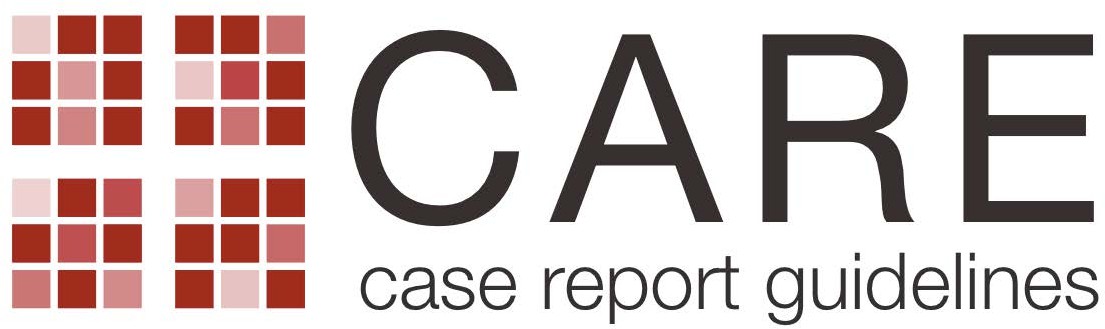
CARE Checklist of information to include when writing a case report
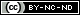


**Topic Item Checklist item description Reported on Line**

**Title 1** The diagnosis or intervention of primary focus followed by the words “case report” title page (page no.1 )

**Key Words 2** 2 to 5 key words that identify diagnoses or interventions in this case report, including "case report" keyword section [page 1]

**Abstract**

**(no references)**

**3a** Introduction: What is unique about this case and what does it add to the scientific literature? Abstract(introduction) [page 1]

**3b** Main symptoms and/or important clinical findings Abstract (case presentation) [page 1-2]

**3c** The main diagnoses, therapeutic interventions, and outcomes Abstract (case presentation) [page 1-2]

**3d** Conclusion—What is the main “take-away” lesson(s) from this case? Abstract(conclusion) [page 2]

**Introduction 4** One or two paragraphs summarizing why this case is unique (**may include** reference**s**) Introduction section [page 2]

**Patient Information 5a** De-identified patient specific information Case presentation [Page 2]

**5b** Primary concerns and symptoms of the patient Case presentation [Page 2]

**5c** Medical, family, and psycho-social history including relevant genetic information Case presentation [Page 2]

**5d** Relevant past interventions with outcomes Case presentation [Page 2]

**Clinical Findings**

**Timeline**

**Diagnostic Assessment**

**Therapeutic Intervention**

**Follow-up and Outcomes**

1. Describe significant physical examination (PE) and important clinical findings Case presentation [Page 2,3,4]
2. Historical and current information from this episode of care organized as a timeline **Not shown as a visual timeline, but explained sequentially in Case Presentation**

**8a** Diagnostic testing (such as PE, laboratory testing, imaging, surveys). Case presentation [Page 3-4]

**8b** Diagnostic challenges (such as access to testing, financial, or cultural) Case presentation [Page ]3-4

**8c** Diagnosis (including other diagnoses considered) Case presentation [Page 3-4]

**8d** Prognosis (such as staging in oncology) where applicable Briefly in discussion section [page 6]

**9a** Types of therapeutic intervention (such as pharmacologic, surgical, preventive, self-care) case presentation [Page 4-5]

**9b** Administration of therapeutic intervention (such as dosage, strength, duration) **Not Discussed (Only focused on surgical procedure)**

**9c** Changes in therapeutic intervention (with rationale) not applicable

**10a** Clinician and patient-assessed outcomes (if available) case presentation [Page 5]

**10b** Important follow-up diagnostic and other test results case presentation (Page 5)

**10c** Intervention adherence and tolerability (How was this assessed?) Case presentation mentions good adherence [Page 5-6]

**10d** Adverse and unanticipated events not reported

**Discussion 11a** A scientific discussion of the strengths AND limitations associated with this case report discussion section [page 6]

**11b** Discussion of the relevant medical literature **with references** discussion section [page 6]

**11c** The scientific rationale for any conclusions (including assessment of possible causes) discussion section [page 6]

**11d** The primary “take-away” lessons of this case report (without references) in a one-paragraph conclusion. conclusion section [page 6]

**Patient Perspective 12** The patient should share their perspective in one to two paragraphs on the treatment(s) they received Not opted by the patient (Mentally -retarted)

**Informed Consent 13** Did the patient give informed consent? Please provide if requested. **Yes
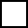
** **No
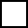
**
